# Supplementary material for: Therapeutic Targeting of Protein Disulfide Isomerase PDIA1 in Multiple Myeloma
Source: MDPI journal article supplement (doi:10.3390/cancers13112649), 2021-05-28

Figure 4. Uncropped blots.

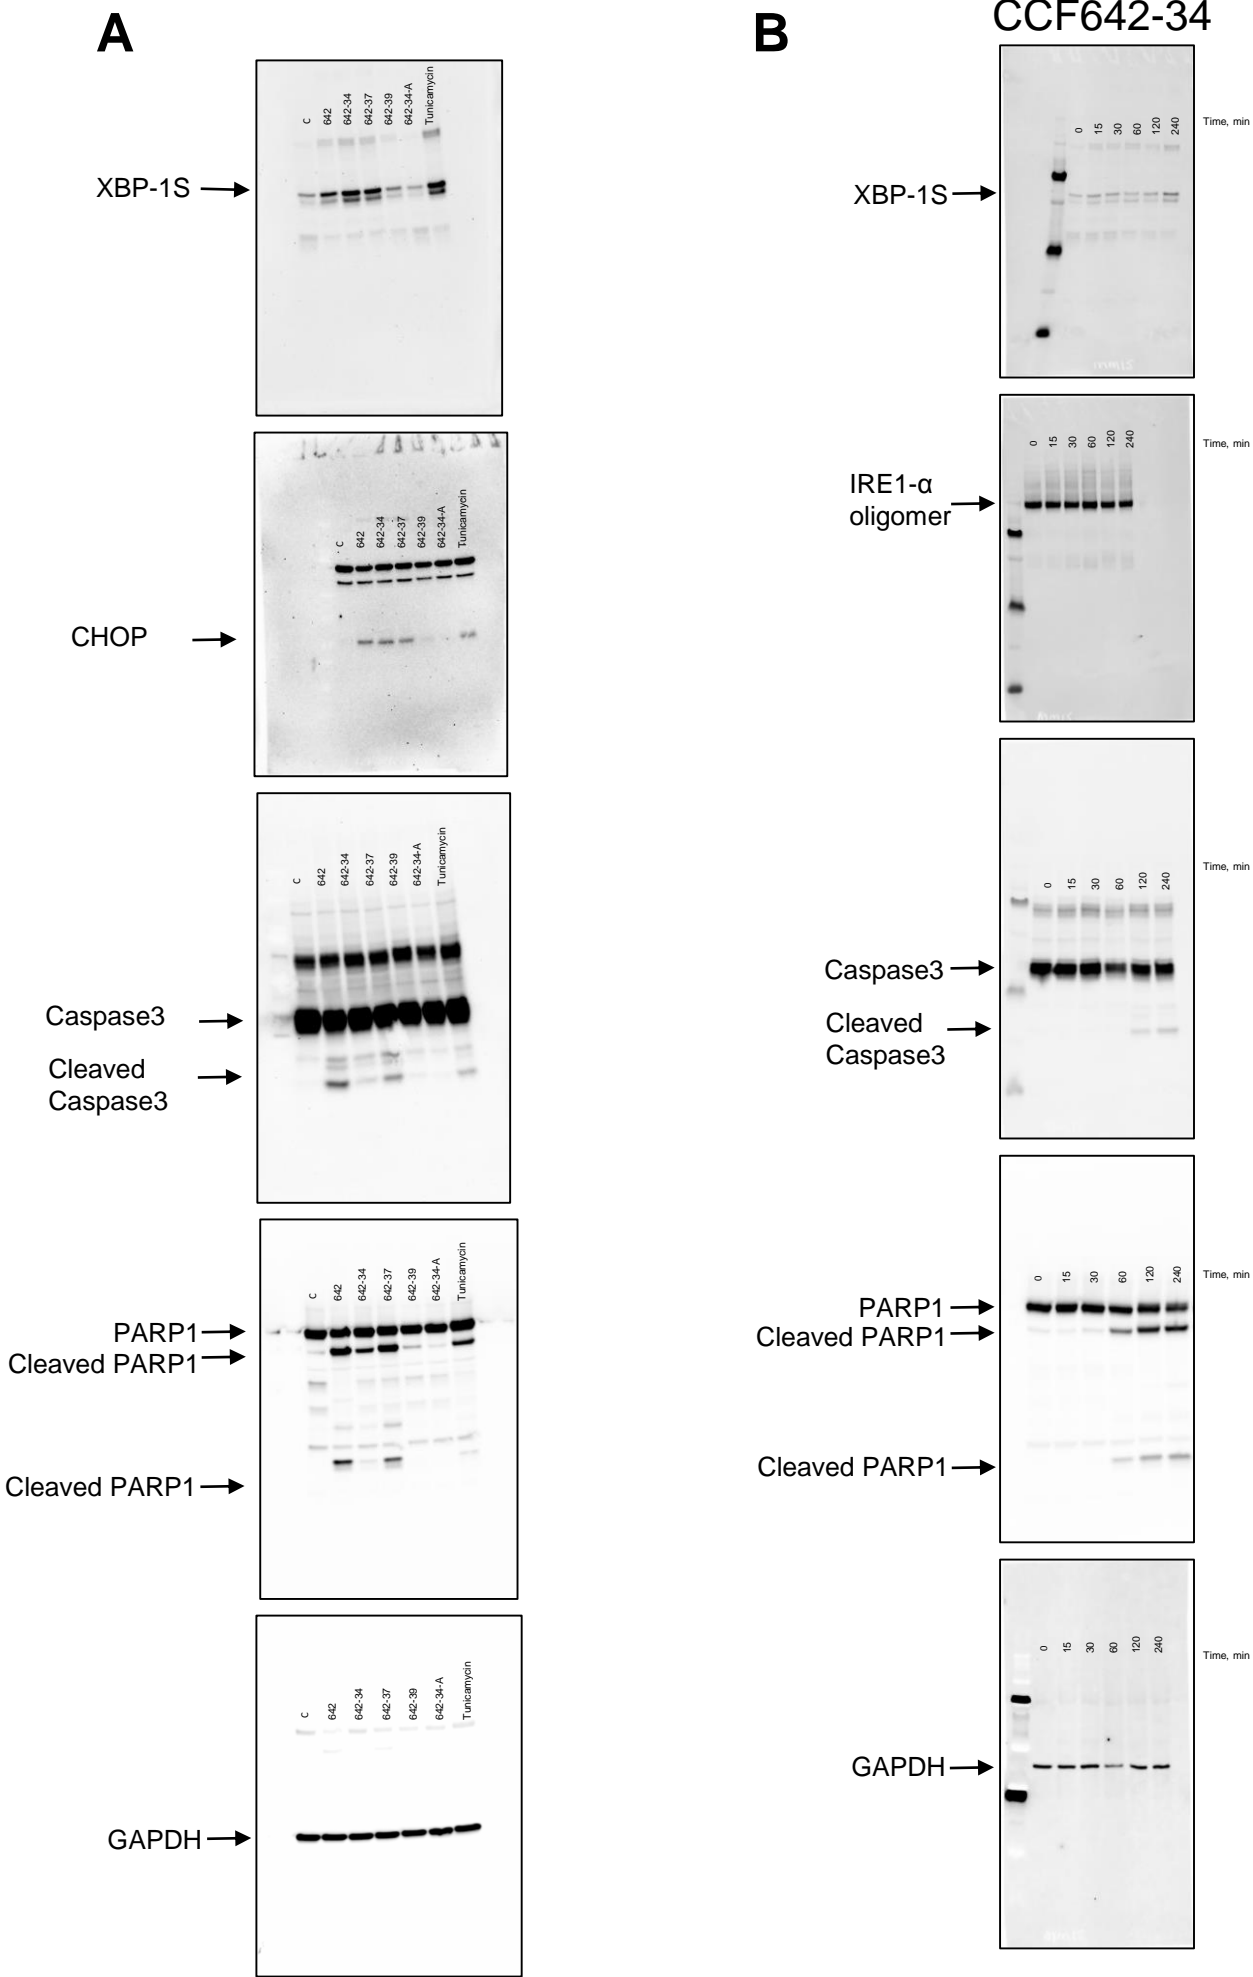

Supplemental Figure 2D. Uncropped blots.

KMS-12-PE

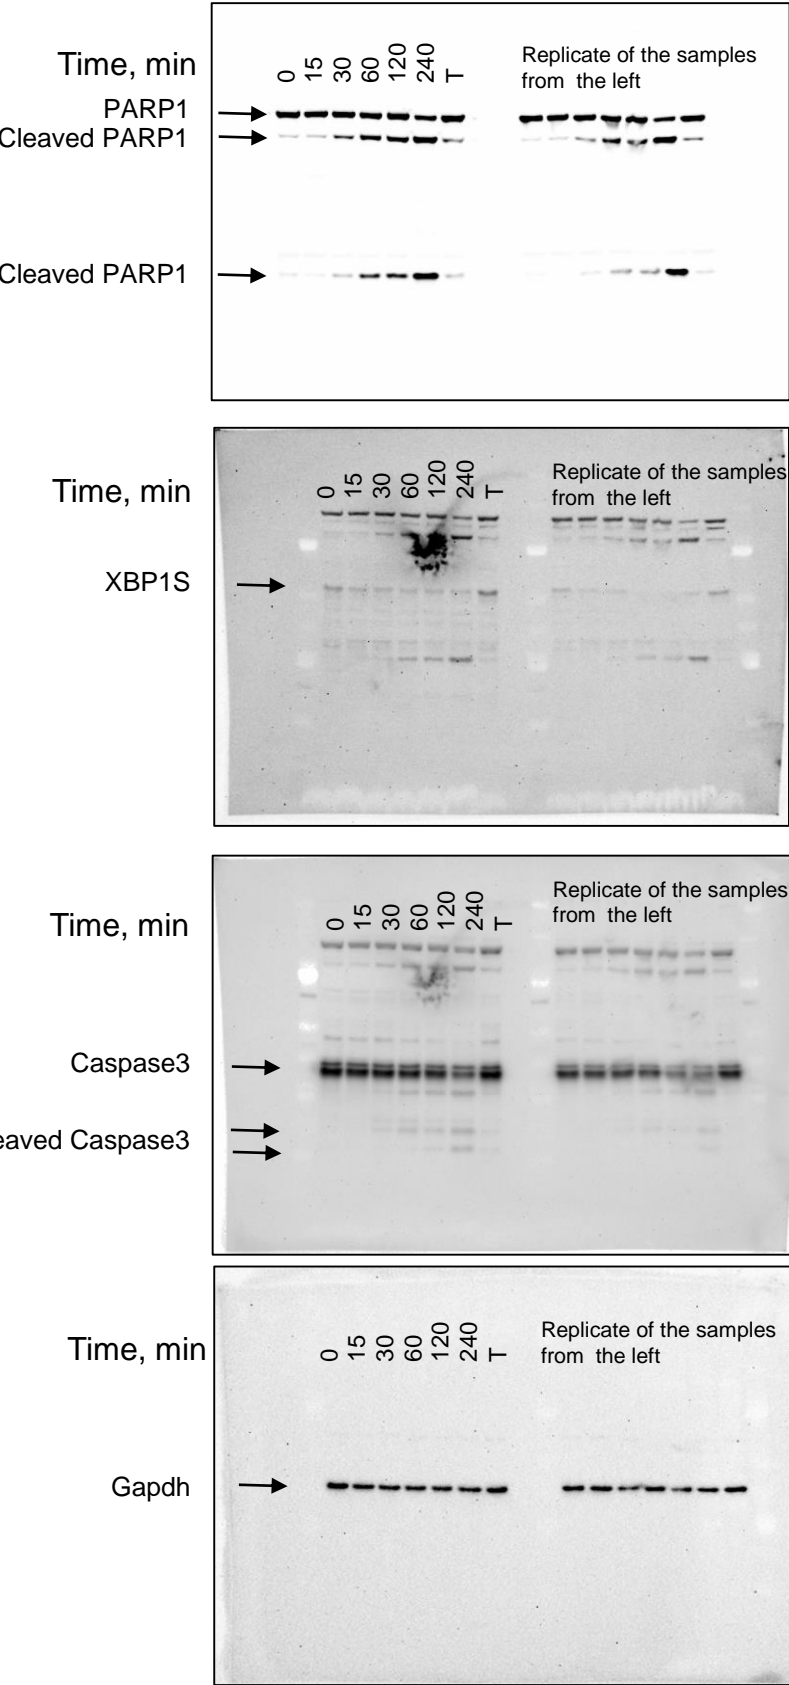

Supplemental Figure 2D. Uncropped blots.

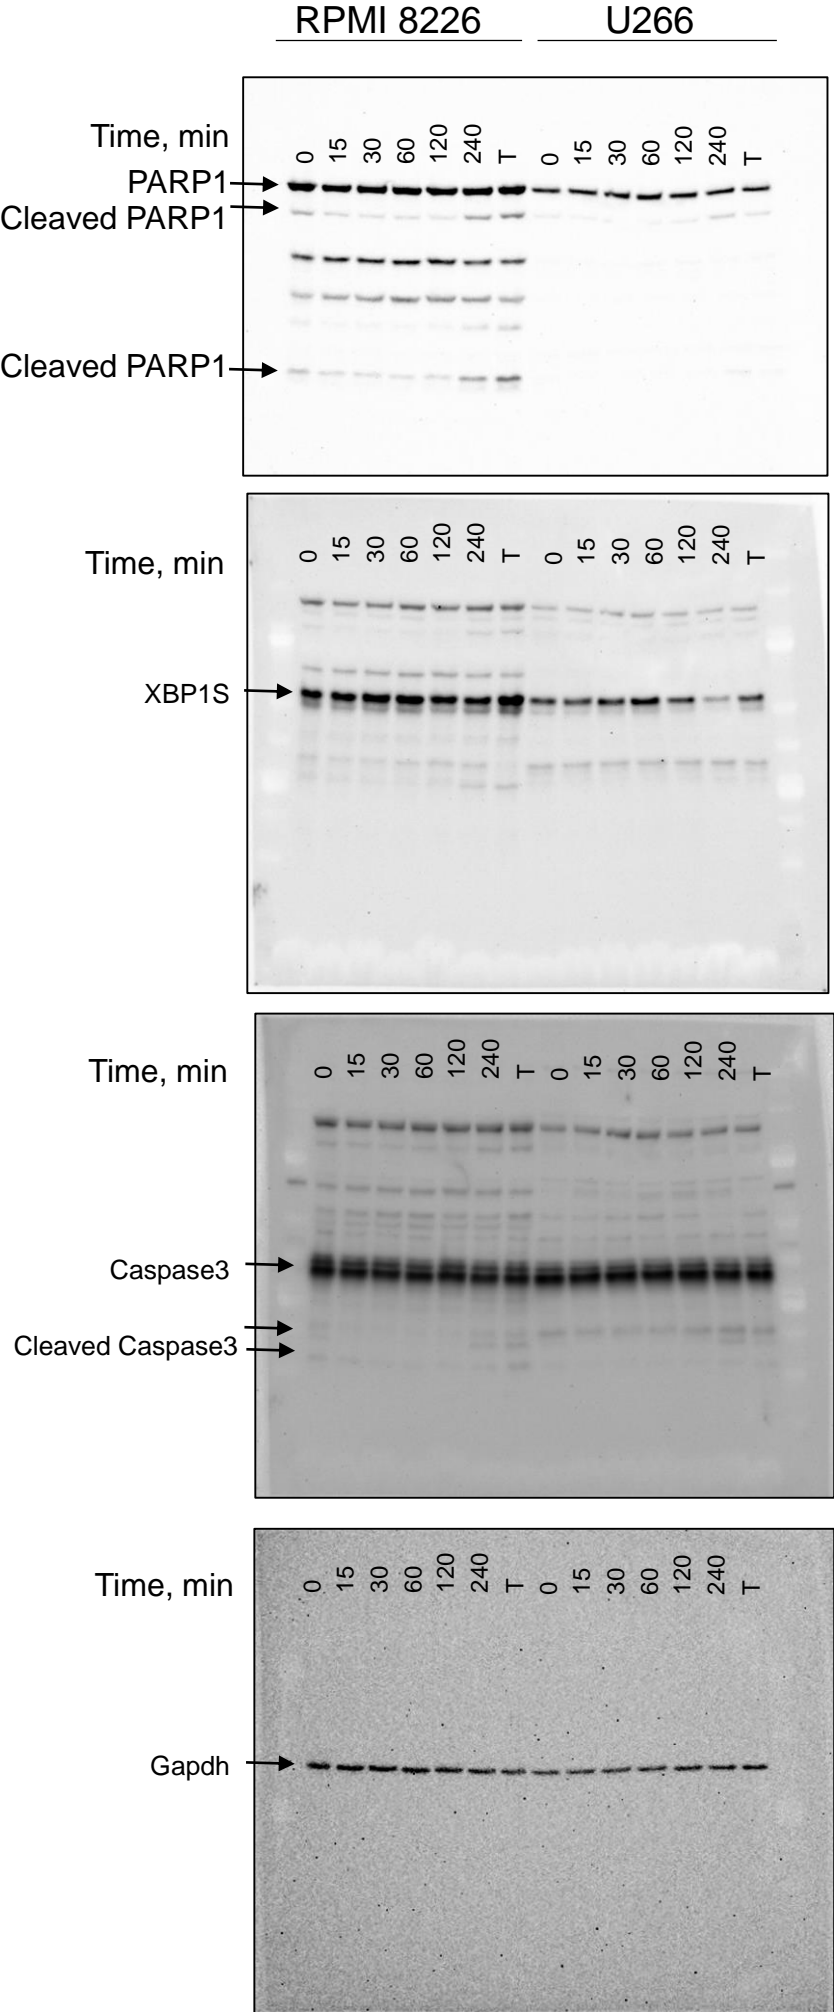

Supplement: s1 [file s1]
